# Supplementary material for: Taxonomic Resolutions Based on 18S rRNA Genes: A Case Study of Subclass Copepoda
Source: PubMed Central journal article supplement (PMC4479608; doi:10.1371/journal.pone.0131498), 2015-06-24
Supplement: pone.0131498.s008.pdf [file pone.0131498.s008.pdf]

**S5 Table.** Accuracy of taxonomic identification at different similarity thresholds.

| Sequences           | Categories    | Lowest Similarity thresholds (%) |              |              |              |              |              |              |              |              |              |              |       |       |       |       |       |       |       |       |       |       |
|---------------------|---------------|----------------------------------|--------------|--------------|--------------|--------------|--------------|--------------|--------------|--------------|--------------|--------------|-------|-------|-------|-------|-------|-------|-------|-------|-------|-------|
|                     |               | 100                              | 99           | 98           | 97           | 96           | 95           | 94           | 93           | 92           | 91           | 90           | 89    | 88    | 87    | 86    | 85    | 84    | 83    | 82    | 81    | 80    |
| Nearly-Whole-length | Intra-species | <b>0.968</b>                     | 0.239        | 0.175        | 0.083        | 0.026        | 0.009        | 0.005        | 0.000        | 0.000        | 0.000        | 0.000        | 0.000 | 0.000 | 0.000 | 0.000 | 0.000 | 0.000 | 0.000 | 0.000 | 0.000 |       |
|                     | Intra-genus   | <b>1.000</b>                     | 0.658        | 0.571        | 0.481        | 0.259        | 0.173        | 0.091        | 0.042        | 0.012        | 0.002        | 0.000        | 0.000 | 0.000 | 0.000 | 0.000 | 0.000 | 0.000 | 0.000 | 0.000 | 0.000 |       |
|                     | Intra-family  | <b>1.000</b>                     | <b>0.999</b> | <b>0.986</b> | <b>0.964</b> | 0.927        | 0.877        | 0.780        | 0.607        | 0.404        | 0.211        | 0.073        | 0.015 | 0.001 | 0.000 | 0.000 | 0.000 | 0.000 | 0.000 | 0.000 | 0.000 |       |
|                     | Intra-order   | <b>1.000</b>                     | <b>1.000</b> | <b>1.000</b> | <b>1.000</b> | <b>0.999</b> | <b>0.995</b> | <b>0.985</b> | <b>0.964</b> | 0.914        | 0.835        | 0.726        | 0.561 | 0.361 | 0.171 | 0.063 | 0.024 | 0.011 | 0.004 | 0.000 | 0.000 |       |
| Section 1           | Intra-species | 0.634                            | 0.133        | 0.076        | 0.035        | 0.011        | 0.003        | 0.000        | 0.000        | 0.000        | 0.000        | 0.000        | 0.000 | 0.000 | 0.000 | 0.000 | 0.000 | 0.000 | 0.000 | 0.000 | 0.000 |       |
|                     | Intra-genus   | 0.918                            | 0.487        | 0.358        | 0.226        | 0.154        | 0.081        | 0.037        | 0.021        | 0.009        | 0.002        | 0.000        | 0.000 | 0.000 | 0.000 | 0.000 | 0.000 | 0.000 | 0.000 | 0.000 | 0.000 |       |
|                     | Intra-family  | <b>0.999</b>                     | <b>0.989</b> | <b>0.948</b> | 0.917        | 0.834        | 0.746        | 0.646        | 0.466        | 0.271        | 0.139        | 0.061        | 0.022 | 0.005 | 0.001 | 0.000 | 0.000 | 0.000 | 0.000 | 0.000 | 0.000 |       |
|                     | Intra-order   | <b>1.000</b>                     | <b>1.000</b> | <b>1.000</b> | <b>1.000</b> | <b>0.999</b> | <b>0.993</b> | <b>0.981</b> | <b>0.959</b> | 0.909        | 0.818        | 0.688        | 0.509 | 0.326 | 0.169 | 0.087 | 0.045 | 0.024 | 0.012 | 0.005 | 0.002 | 0.001 |
| Section 2           | Intra-species | 0.861                            | 0.334        | 0.171        | 0.080        | 0.033        | 0.014        | 0.007        | 0.002        | 0.000        | 0.000        | 0.000        | 0.000 | 0.000 | 0.000 | 0.000 | 0.000 | 0.000 | 0.000 | 0.000 | 0.000 |       |
|                     | Intra-genus   | <b>0.989</b>                     | 0.736        | 0.632        | 0.511        | 0.398        | 0.288        | 0.242        | 0.109        | 0.043        | 0.017        | 0.007        | 0.000 | 0.000 | 0.000 | 0.000 | 0.000 | 0.000 | 0.000 | 0.000 | 0.000 |       |
|                     | Intra-family  | <b>1.000</b>                     | <b>0.997</b> | <b>0.988</b> | <b>0.964</b> | 0.940        | 0.908        | 0.859        | 0.807        | 0.705        | 0.515        | 0.333        | 0.154 | 0.058 | 0.014 | 0.002 | 0.000 | 0.000 | 0.000 | 0.000 | 0.000 |       |
|                     | Intra-order   | <b>1.000</b>                     | <b>1.000</b> | <b>1.000</b> | <b>1.000</b> | <b>0.999</b> | <b>0.998</b> | <b>0.994</b> | <b>0.981</b> | <b>0.954</b> | 0.913        | 0.850        | 0.750 | 0.586 | 0.376 | 0.193 | 0.074 | 0.026 | 0.009 | 0.002 | 0.001 | 0.000 |
| Section 3           | Intra-species | 0.784                            | 0.615        | 0.404        | 0.326        | 0.267        | 0.149        | 0.116        | 0.080        | 0.033        | 0.012        | 0.009        | 0.003 | 0.000 | 0.000 | 0.000 | 0.000 | 0.000 | 0.000 | 0.000 | 0.000 |       |
|                     | Intra-genus   | <b>0.955</b>                     | 0.927        | 0.858        | 0.817        | 0.761        | 0.649        | 0.592        | 0.521        | 0.399        | 0.234        | 0.173        | 0.120 | 0.060 | 0.037 | 0.019 | 0.008 | 0.003 | 0.001 | 0.000 | 0.000 | 0.000 |
|                     | Intra-family  | <b>1.000</b>                     | <b>0.998</b> | <b>0.991</b> | <b>0.985</b> | <b>0.972</b> | 0.939        | 0.910        | 0.863        | 0.788        | 0.677        | 0.592        | 0.490 | 0.336 | 0.258 | 0.176 | 0.107 | 0.064 | 0.035 | 0.016 | 0.007 | 0.002 |
|                     | Intra-order   | <b>1.000</b>                     | <b>1.000</b> | <b>1.000</b> | <b>1.000</b> | <b>0.999</b> | <b>0.998</b> | <b>0.995</b> | <b>0.992</b> | <b>0.981</b> | <b>0.961</b> | 0.938        | 0.897 | 0.813 | 0.744 | 0.630 | 0.495 | 0.386 | 0.272 | 0.182 | 0.122 | 0.065 |
| Section 4           | Intra-species | 0.526                            | 0.182        | 0.056        | 0.028        | 0.010        | 0.005        | 0.001        | 0.000        | 0.000        | 0.000        | 0.000        | 0.000 | 0.000 | 0.000 | 0.000 | 0.000 | 0.000 | 0.000 | 0.000 | 0.000 |       |
|                     | Intra-genus   | 0.874                            | 0.498        | 0.235        | 0.144        | 0.088        | 0.065        | 0.027        | 0.011        | 0.006        | 0.002        | 0.000        | 0.000 | 0.000 | 0.000 | 0.000 | 0.000 | 0.000 | 0.000 | 0.000 | 0.000 |       |
|                     | Intra-family  | <b>0.998</b>                     | <b>0.992</b> | <b>0.959</b> | 0.912        | 0.824        | 0.765        | 0.609        | 0.437        | 0.331        | 0.207        | 0.115        | 0.063 | 0.029 | 0.013 | 0.004 | 0.001 | 0.000 | 0.000 | 0.000 | 0.000 |       |
|                     | Intra-order   | <b>1.000</b>                     | <b>1.000</b> | <b>0.999</b> | <b>0.994</b> | <b>0.978</b> | <b>0.966</b> | 0.912        | 0.842        | 0.771        | 0.656        | 0.588        | 0.473 | 0.356 | 0.249 | 0.143 | 0.096 | 0.051 | 0.024 | 0.016 | 0.006 | 0.002 |
| Section 5           | Intra-species | 0.642                            | 0.430        | 0.250        | 0.151        | 0.109        | 0.075        | 0.059        | 0.033        | 0.016        | 0.010        | 0.006        | 0.003 | 0.000 | 0.000 | 0.000 | 0.000 | 0.000 | 0.000 | 0.000 | 0.000 |       |
|                     | Intra-genus   | <b>0.953</b>                     | 0.914        | 0.836        | 0.760        | 0.673        | 0.591        | 0.502        | 0.379        | 0.293        | 0.193        | 0.128        | 0.077 | 0.049 | 0.028 | 0.020 | 0.012 | 0.009 | 0.004 | 0.002 | 0.001 | 0.000 |
|                     | Intra-family  | <b>1.000</b>                     | <b>0.999</b> | <b>0.990</b> | <b>0.981</b> | <b>0.962</b> | 0.944        | 0.924        | 0.880        | 0.831        | 0.761        | 0.692        | 0.611 | 0.506 | 0.413 | 0.340 | 0.256 | 0.193 | 0.136 | 0.092 | 0.057 | 0.032 |
|                     | Intra-order   | <b>1.000</b>                     | <b>1.000</b> | <b>1.000</b> | <b>1.000</b> | <b>0.999</b> | <b>0.999</b> | <b>0.997</b> | <b>0.993</b> | <b>0.987</b> | <b>0.977</b> | <b>0.962</b> | 0.936 | 0.911 | 0.883 | 0.854 | 0.811 | 0.776 | 0.743 | 0.702 | 0.650 | 0.572 |
