# Supplementary material for: Taxonomic Resolutions Based on 18S rRNA Genes: A Case Study of Subclass Copepoda
Source: PubMed Central journal article supplement (PMC4479608; doi:10.1371/journal.pone.0131498), 2015-06-24
Supplement: pone.0131498.s009.pdf [file pone.0131498.s009.pdf]

**S6 Table. A subset sequences from taxonomic studies used in additional analysis**

| 18S rDNA sequences  | Lengths (bp) | Number of Sequences | Number of order | Number of family | Number of genus | Number of species |
|---------------------|--------------|---------------------|-----------------|------------------|-----------------|-------------------|
| Nearly-whole-length | 1755-1843    | 96                  | 7               | 51               | 87              | 93                |
| Section 1           | 489-544      | 130                 | 7               | 52               | 97              | 122               |
| Section 2           | 574-612      | 148                 | 7               | 56               | 105             | 138               |
| Section 3           | 126-137      | 123                 | 7               | 51               | 96              | 118               |
| Section 4           | 160-165      | 165                 | 7               | 55               | 103             | 139               |
| Section 5           | 107-132      | 108                 | 7               | 51               | 91              | 105               |
