# Supplementary material for: Taxonomic Resolutions Based on 18S rRNA Genes: A Case Study of Subclass Copepoda
Source: PubMed Central journal article supplement (PMC4479608; doi:10.1371/journal.pone.0131498), 2015-06-24
Supplement: pone.0131498.s010.pdf [file pone.0131498.s010.pdf]

**S7 Table.** Same as Table 3, applied to the subset sequences.

| Sequences           | V regions | The best similarity thresholds/success (%) |           |         |         | The lowest similarity thresholds/accuracy (%) <sup>*</sup> |             |              |             |
|---------------------|-----------|--------------------------------------------|-----------|---------|---------|------------------------------------------------------------|-------------|--------------|-------------|
|                     |           | S/G                                        | G/F       | F/O     | O/I     | Intra-species                                              | Intra-genus | Intra-family | Intra-order |
| Nearly-whole-length | V1-9      | 99.9/83                                    | 98.5/94.4 | 93.1/71 | 91.1/66 | 100/100                                                    | 99/95       | 97/97        | 94/95       |
| Section 1           | V1-3      |                                            | 99.5/72.1 | 94.2/81 | 91.3/74 |                                                            | 100/97      | 97/96        | 95/98       |
| Section 2           | V4-5      | 99.9/79                                    | 99.1/69.9 | 92.6/84 | 88.8/71 |                                                            | 100/100     | 96/95        | 93/95       |
| Section 3           | V7        | 99.3/86                                    | 94.6/76.3 | 90.1/71 | 86.8/66 |                                                            | 99/96       | 95/95        | 92/95       |
| Section 4           | V8        |                                            | 98.9/77.5 | 96.9/87 | 92.5/69 |                                                            |             | 99/97        | 96/95       |
| Section 5           | V9        | 99.3/83                                    | 96.7/88.6 | 90.0/81 | 84.8/61 |                                                            | 99/98       | 94/95        | 92/96       |

<sup>\*</sup> 95% is the lowest accuracy accepted in this case
