# Supplementary material for: Taxonomic Resolutions Based on 18S rRNA Genes: A Case Study of Subclass Copepoda
Source: PLoS One. 2015 Jun 24;10(6):e0131498. doi: 10.1371/journal.pone.0131498 (PMC4479608; doi:10.1371/journal.pone.0131498)
Supplement: S4 Table — (XLSX) [file pone.0131498.s007.xlsx]

## Sheet: 184
GI	Accession	Definition	Sequence length	Order	Family	Genus	Species
295443359	GU969152.1	Haloptilus longicornis 18S ribosomal RNA gene, partial sequence	1,811 bp	Calanoida	Augaptilidae	Haloptilus	Haloptilus longicornis
3851188	L81939.1	Calanus pacificus 18S ribosomal RNA gene, complete sequence	1,800 bp	Calanoida	Calanidae	Calanus	Calanus pacificus
515421956	JX995315.1	Calanus helgolandicus isolate MT00562 18S ribosomal RNA gene, partial sequence	1,750 bp	Calanoida	Calanidae	Calanus	Calanus helgolandicus
31324182	AF514344.1	Neocalanus cristatus clone A line 18S ribosomal RNA gene, partial sequence	1,802 bp	Calanoida	Calanidae	Neocalanus	Neocalanus cristatus
295443385	GU969178.1	Neocalanus robustior 18S ribosomal RNA gene, partial sequence	1,738 bp	Calanoida	Calanidae	Neocalanus	Neocalanus robustior
295443367	GU969160.1	Calocalanus pavo 18S ribosomal RNA gene, partial sequence	1,706 bp	Calanoida	Calocalanidae	Calocalanus	Calocalanus pavo
295443406	GU969199.1	Candacia pachydactyla 18S ribosomal RNA gene, partial sequence	1,741 bp	Calanoida	Candaciidae	Candacia	Candacia pachydactyla
295443368	GU969161.1	Candacia truncata 18S ribosomal RNA gene, partial sequence	1,786 bp	Calanoida	Candaciidae	Candacia	Candacia truncata
295443352	GU969145.1	Candacia discaudata 18S ribosomal RNA gene, partial sequence	1,751 bp	Calanoida	Candaciidae	Candacia	Candacia discaudata
295443420	GU969213.1	Candacia bispinosa 18S ribosomal RNA gene, partial sequence	1,731 bp	Calanoida	Candaciidae	Candacia	Candacia bispinosa
377652296	AB625973.1	Candacia bipinnata gene for 18S ribosomal RNA, partial sequence	1,708 bp	Calanoida	Candaciidae	Candacia	Candacia bipinnata
377652297	AB625974.1	Candacia columbiae gene for 18S ribosomal RNA, partial sequence	1,707 bp	Calanoida	Candaciidae	Candacia	Candacia columbiae
515421765	JX995296.1	Centropages typicus isolate MT00585 18S ribosomal RNA gene, partial sequence	1,752 bp	Calanoida	Centropagidae	Centropages	Centropages typicus
515421761	JX995292.1	Centropages hamatus isolate MT00537 18S ribosomal RNA gene, partial sequence	1,751 bp	Calanoida	Centropagidae	Centropages	Centropages hamatus
295443365	GU969158.1	Centropages furcatus 18S ribosomal RNA gene, partial sequence	1,791 bp	Calanoida	Centropagidae	Centropages	Centropages furcatus
295443349	GU969142.1	Sinocalanus sinensis 18S ribosomal RNA gene, partial sequence	1,794 bp	Calanoida	Centropagidae	Sinocalanus	Sinocalanus sinensis
295443351	GU969144.1	Sinocalanus tenellus 18S ribosomal RNA gene, partial sequence	1,761 bp	Calanoida	Centropagidae	Sinocalanus	Sinocalanus tenellus
515421835	JX995302.1	Isias clavipes isolate MT03344 18S ribosomal RNA gene, partial sequence	1,751 bp	Calanoida	Centropagidae	Isias	Isias clavipes
515422046	JX995322.1	Pseudocalanus moultoni isolate MT00778 18S ribosomal RNA gene, partial sequence	1,750 bp	Calanoida	Clausocalanidae	Pseudocalanus	Pseudocalanus moultoni
515421999	JX995319.1	Pseudocalanus elongatus isolate MT00786 18S ribosomal RNA gene, partial sequence	1,750 bp	Calanoida	Clausocalanidae	Pseudocalanus	Pseudocalanus elongatus
37811482	AY339145.1	Aglaodiaptomus clavipoides 18S ribsomal RNA gene, partial sequence	1,743 bp	Calanoida	Diaptomidae	Aglaodiaptomus	Aglaodiaptomus clavipoides
37811483	AY339146.1	Aglaodiaptomus leptopus 18S ribsomal RNA gene, partial sequence	1,743 bp	Calanoida	Diaptomidae	Aglaodiaptomus	Aglaodiaptomus leptopus
37811481	AY339144.1	Aglaodiaptomus spatulocrenatus 18S ribsomal RNA gene, partial sequence	1,743 bp	Calanoida	Diaptomidae	Aglaodiaptomus	Aglaodiaptomus spatulocrenatus
37811484	AY339147.1	Arctodiaptomus dorsalis 18S ribsomal RNA gene, partial sequence	1,728 bp	Calanoida	Diaptomidae	Arctodiaptomus	Arctodiaptomus dorsalis
37811485	AY339148.1	Eudiaptomus gracilis 18S ribsomal RNA gene, partial sequence	1,742 bp	Calanoida	Diaptomidae	Eudiaptomus	Eudiaptomus gracilis
37811486	AY339149.1	Eudiaptomus graciloides 18S ribsomal RNA gene, partial sequence	1,742 bp	Calanoida	Diaptomidae	Eudiaptomus	Eudiaptomus graciloides
37811487	AY339150.1	Hesperodiaptomus shoshone 18S ribsomal RNA gene, partial sequence	1,726 bp	Calanoida	Diaptomidae	Hesperodiaptomus	Hesperodiaptomus shoshone
37811488	AY339151.1	Leptodiaptomus ashlandi 18S ribsomal RNA gene, partial sequence	1,727 bp	Calanoida	Diaptomidae	Leptodiaptomus	Leptodiaptomus ashlandi
37811489	AY339152.1	Leptodiaptomus coloradensis 18S ribsomal RNA gene, partial sequence	1,742 bp	Calanoida	Diaptomidae	Leptodiaptomus	Leptodiaptomus coloradensis
37811490	AY339153.1	Leptodiaptomus minutus 18S ribsomal RNA gene, partial sequence	1,743 bp	Calanoida	Diaptomidae	Leptodiaptomus	Leptodiaptomus minutus
37811491	AY339154.1	Leptodiaptomus moorei 18S ribsomal RNA gene, partial sequence	1,743 bp	Calanoida	Diaptomidae	Leptodiaptomus	Leptodiaptomus moorei
37811492	AY339155.1	Leptodiaptomus sicilis 18S ribsomal RNA gene, partial sequence	1,743 bp	Calanoida	Diaptomidae	Leptodiaptomus	Leptodiaptomus sicilis
37811493	AY339156.1	Mastigodiaptomus nesus 18S ribsomal RNA gene, partial sequence	1,743 bp	Calanoida	Diaptomidae	Mastigodiaptomus	Mastigodiaptomus nesus
37811494	AY339157.1	Onychodiaptomus sanguineus 18S ribsomal RNA gene, partial sequence	1,743 bp	Calanoida	Diaptomidae	Onychodiaptomus	Onychodiaptomus sanguineus
37811495	AY339158.1	Skistodiaptomus mississippiensis 18S ribsomal RNA gene, partial sequence	1,743 bp	Calanoida	Diaptomidae	Skistodiaptomus	Skistodiaptomus mississippiensis
37811496	AY339159.1	Skistodiaptomus oregonensis 18S ribsomal RNA gene, partial sequence	1,743 bp	Calanoida	Diaptomidae	Skistodiaptomus	Skistodiaptomus oregonensis
37811497	AY339160.1	Skistodiaptomus pallidus 18S ribsomal RNA gene, partial sequence	1,743 bp	Calanoida	Diaptomidae	Skistodiaptomus	Skistodiaptomus pallidus
37811498	AY339161.1	Skistodiaptomus pygmaeus 18S ribsomal RNA gene, partial sequence	1,743 bp	Calanoida	Diaptomidae	Skistodiaptomus	Skistodiaptomus pygmaeus
295443409	GU969202.1	Eucalanus elongatus 18S ribosomal RNA gene, partial sequence	1,711 bp	Calanoida	Eucalanidae	Eucalanus	Eucalanus elongatus
295443355	GU969148.1	Pareucalanus attenuatus 18S ribosomal RNA gene, partial sequence	1,750 bp	Calanoida	Eucalanidae	Pareucalanus	Pareucalanus attenuatus
295443398	GU969191.1	Rhincalanus nasutus 18S ribosomal RNA gene, partial sequence	1,736 bp	Calanoida	Eucalanidae	Rhincalanus	Rhincalanus nasutus
295443395	GU969188.1	Subeucalanus pileatus 18S ribosomal RNA gene, partial sequence	1,794 bp	Calanoida	Eucalanidae	Subeucalanus	Subeucalanus pileatus
295443350	GU969143.1	Subeucalanus subtenuis 18S ribosomal RNA gene, partial sequence	1,741 bp	Calanoida	Eucalanidae	Subeucalanus	Subeucalanus subtenuis
295443375	GU969168.1	Subeucalanus crassus 18S ribosomal RNA gene, partial sequence	1,739 bp	Calanoida	Eucalanidae	Subeucalanus	Subeucalanus crassus
295443376	GU969169.1	Subeucalanus mucronatus 18S ribosomal RNA gene, partial sequence	1,740 bp	Calanoida	Eucalanidae	Subeucalanus	Subeucalanus mucronatus
295443354	GU969147.1	Euchaeta concinna 18S ribosomal RNA gene, partial sequence	1,771 bp	Calanoida	Eucalanidae	Euchaeta	Euchaeta concinna
295443377	GU969170.1	Euchaeta indica 18S ribosomal RNA gene, partial sequence	1,745 bp	Calanoida	Eucalanidae	Euchaeta	Euchaeta indica
295443410	GU969203.1	Mecynocera clausi 18S ribosomal RNA gene, partial sequence	1,701 bp	Calanoida	Mecynoceridae	Mecynocera	Mecynocera clausi
295443383	GU969176.1	Metridia gerlachei 18S ribosomal RNA gene, partial sequence	1,741 bp	Calanoida	Metridinidae	Metridia	Metridia gerlachei
295443390	GU969183.1	Pleuromamma abdominalis 18S ribosomal RNA gene, partial sequence	1,739 bp	Calanoida	Metridinidae	Pleuromamma	Pleuromamma abdominalis
295443393	GU969186.1	Pleuromamma xiphias 18S ribosomal RNA gene, partial sequence	1,721 bp	Calanoida	Metridinidae	Pleuromamma	Pleuromamma xiphias
295443408	GU969201.1	Acrocalanus monachus 18S ribosomal RNA gene, partial sequence	1,716 bp	Calanoida	Paracalanidae	Acrocalanus	Acrocalanus monachus
515421932	JX995311.1	Paracalanus parvus isolate MT00828 18S ribosomal RNA gene, partial sequence	1,747 bp	Calanoida	Paracalanidae	Paracalanus	Paracalanus parvus
295443411	GU969204.1	Pontellina plumata 18S ribosomal RNA gene, partial sequence	1,706 bp	Calanoida	Pontellidae	Pontellina	Pontellina plumata
515421857	JX995305.1	Anomalocera patersoni isolate MT00522 18S ribosomal RNA gene, partial sequence	1,750 bp	Calanoida	Pontellidae	Anomalocera	Anomalocera patersoni
54401802	AY629258.1	Pseudodiaptomus annandalei 18S small subunit ribosomal RNA gene, partial sequence	1,787 bp	Calanoida	Pseudodiaptomidae	Pseudodiaptomus	Pseudodiaptomus annandalei
295443400	GU969193.1	Pseudodiaptomus poplesia 18S ribosomal RNA gene, partial sequence	1,742 bp	Calanoida	Pseudodiaptomidae	Pseudodiaptomus	Pseudodiaptomus poplesia
295443401	GU969194.1	Pseudodiaptomus inopinus 18S ribosomal RNA gene, partial sequence	1,755 bp	Calanoida	Pseudodiaptomidae	Pseudodiaptomus	Pseudodiaptomus inopinus
54401803	AY629259.1	Exumella mediterranea 18S small subunit ribosomal RNA gene, partial sequence	1,805 bp	Calanoida	Ridgewayiidae	Exumella	Exumella mediterranea
295443418	GU969211.1	Temora turbinata 18S ribosomal RNA gene, partial sequence	1,738 bp	Calanoida	Temoridae	Temora	Temora turbinata
515421872	JX995308.1	Temora longicornis isolate MT00503 18S ribosomal RNA gene, partial sequence	1,749 bp	Calanoida	Temoridae	Temora	Temora longicornis
515421806	JX995299.1	Eurytemora affinis isolate MT00837 18S ribosomal RNA gene, partial sequence	1,753 bp	Calanoida	Temoridae	Eurytemora	Eurytemora affinis
54401764	AY626995.1	Tortanus sp. New Caledonia-RJH-2004 18S small subunit ribosomal RNA gene, partial sequence	1,805 bp	Calanoida	Tortanidae	Tortanus	Tortanus sp. New Caledonia-RJH-2004
54401763	AY626994.1	Pseudocyclops sp. Japan-RJH-2004 18S small subunit ribosomal RNA gene, partial sequence	1,785 bp	Calanoida	Pseudocyclopidae	Pseudocyclops	Pseudocyclops sp. Japan-RJH-2004
54401770	AY627001.1	Anchimolgus sp. New Caledonia-RJH-2004 18S small subunit ribosomal RNA gene, partial sequence	1,768 bp	Cyclopoida	Anchimolgidae	Anchimolgus	Anchimolgus sp. New Caledonia-RJH-2004
54401771	AY627002.1	Anthessius sp. New Caledonia-RJH-2004 18S small subunit ribosomal RNA gene, partial sequence	1,799 bp	Cyclopoida	Anthessiidae	Anthessius	Anthessius sp. New Caledonia-RJH-2004
54401768	AY626999.1	Acanthocyclops viridis 18S small subunit ribosomal RNA gene, partial sequence	1,816 bp	Cyclopoida	Cyclopidae	Acanthocyclops	Acanthocyclops viridis
54401766	AY626997.1	Apocyclops royi 18S small subunit ribosomal RNA gene, partial sequence	1,784 bp	Cyclopoida	Cyclopidae	Apocyclops	Apocyclops royi
54401767	AY626998.1	Cyclops sp. UK-RJH-2004 18S small subunit ribosomal RNA gene, partial sequence	1,810 bp	Cyclopoida	Cyclopidae	Cyclops	Cyclops sp. UK-RJH-2004
121487599	AJ746336.1	Ectocyclops polyspinosus 18S rRNA gene,	1,808 bp	Cyclopoida	Cyclopidae	Ectocyclops	Ectocyclops polyspinosus
121487595	AJ746332.1	Eucyclops serrulatus 18S rRNA gene, population variant type-II from Russia,	1,809 bp	Cyclopoida	Cyclopidae	Eucyclops	Eucyclops serrulatus
121487592	AJ746329.1	Eucyclops macruroides 18S rRNA gene,	1,809 bp	Cyclopoida	Cyclopidae	Eucyclops	Eucyclops macruroides
121487596	AJ746333.1	Eucyclops speratus 18S rRNA gene,	1,809 bp	Cyclopoida	Cyclopidae	Eucyclops	Eucyclops speratus
121487598	AJ746335.1	Eucyclops dumonti 18S rRNA gene,	1,808 bp	Cyclopoida	Cyclopidae	Eucyclops	Eucyclops dumonti
54401765	AY626996.1	Euryte sp. New Caledonia-RJH-2004 18S small subunit ribosomal RNA gene, partial sequence	1,782 bp	Cyclopoida	Cyclopidae	Euryte	Euryte sp. New Caledonia-RJH-2004
121487597	AJ746334.1	Macrocyclops albidus 18S rRNA gene,	1,808 bp	Cyclopoida	Cyclopidae	Macrocyclops	Macrocyclops albidus
315305806	HM775187.1	Mytilicola intestinalis isolate Mi2 18S ribosomal RNA gene, partial sequence	1,744 bp	Cyclopoida	Mytilicolidae	Mytilicola	Mytilicola intestinalis
315305809	HM775190.1	Mytilicola orientalis isolate Mo10 18S ribosomal RNA gene, partial sequence	1,744 bp	Cyclopoida	Mytilicolidae	Mytilicola	Mytilicola orientalis
54401775	AY627006.1	Trochicola entericus 18S small subunit ribosomal RNA gene, partial sequence	1,781 bp	Cyclopoida	Mytilicolidae	Trochicola	Trochicola entericus
356471528	JF781539.1	Oithona sp. 1 New Caledonia-RJH-2001 18S ribosomal RNA gene, partial sequence	1,805 bp	Cyclopoida	Oithonidae	Oithona	Oithona sp. 1 New Caledonia-RJH-2001
54401777	AY627008.1	Critomolgus sp. 1 New Caledonia-RJH-2004 18S small subunit ribosomal RNA gene, partial sequence	1,804 bp	Cyclopoida	Rhynchomolgidae	Critomolgus	Critomolgus sp. 1 New Caledonia-RJH-2004
356471530	JF781541.1	Doridicola agilis 18S ribosomal RNA gene, partial sequence	1,803 bp	Cyclopoida	Rhynchomolgidae	Doridicola	Doridicola agilis
54401779	AY627010.1	Sabelliphilus elongatus 18S small subunit ribosomal RNA gene, partial sequence	1,766 bp	Cyclopoida	Sabelliphilida	Sabelliphilus	Sabelliphilus elongatus
54401780	AY627011.1	Scambicornus sp. New Caledonia-RJH-2004 18S small subunit ribosomal RNA gene, partial sequence	1,766 bp	Cyclopoida	Synapticolidae	Scambicornus	Scambicornus sp. New Caledonia-RJH-2004
54401781	AY627012.1	Vahinius sp. New Caledonia-RJH-2004 18S small subunit ribosomal RNA gene, partial sequence	1,755 bp	Cyclopoida	Vahiniidae	Vahinius	Vahinius sp. New Caledonia-RJH-2004
54401782	AY627013.1	Xarifia sp. New Caledonia-RJH-2004 18S small subunit ribosomal RNA gene, partial sequence	1,805 bp	Cyclopoida	Xarifiidae	Xarifia	Xarifia sp. New Caledonia-RJH-2004
356471525	JF781536.1	Notodelphys prasina 18S ribosomal RNA gene, partial sequence	1,807 bp	Cyclopoida	Notodelphyidae	Notodelphys	Notodelphys prasina
208502869	FJ214952.1	Paracyclopina nana 18S ribosomal RNA gene, internal transcribed spacer 1, 5.8S ribosomal RNA gene, internal transcribed spacer 2, 28S ribosomal RNA gene, and intergenic spacer, complete sequence	7,974 bp	Cyclopoida	Cyclopettidae	Paracyclopina	Paracyclopina nana
356471527	JF781538.1	Archinotodelphys sp. New Caledonia-RJH-2001 18S ribosomal RNA gene, partial sequence	1,813 bp	Cyclopoida	Archinotodelphyidae	Archinotodelphys	Archinotodelphys sp. New Caledonia-RJH-2001
356471526	JF781537.1	Cyclopina gracilis 18S ribosomal RNA gene, partial sequence	1,807 bp	Cyclopoida	Cyclopinidae	Cyclopina	Cyclopina gracilis
170601562	EU380303.1	Ameira scotti 18S ribosomal RNA gene, partial sequence	1,790 bp	Harpacticoida	Ameiridae	Ameira	Ameira scotti
170601573	EU380306.1	Argestigens sp. Greenland-RJH-2007 18S ribosomal RNA gene, partial sequence	1,788 bp	Harpacticoida	Ameiridae	Argestigens	Argestigens sp. Greenland-RJH-2007
170601570	EU380305.1	Nitocra hibernica 18S ribosomal RNA gene, partial sequence	1,824 bp	Harpacticoida	Ameiridae	Nitocra	Nitocra hibernica
170601566	EU380304.1	Sarsameira sp. Greenland-RJH-2007 18S ribosomal RNA gene, partial sequence	1,824 bp	Harpacticoida	Ameiridae	Sarsameira	Sarsameira sp. Greenland-RJH-2007
170601586	EU380310.1	Eurycletodes laticauda 18S ribosomal RNA gene, partial sequence	1,789 bp	Harpacticoida	Argestidae	Eurycletodes	Eurycletodes laticauda
170601576	EU380307.1	Attheyella crassa 18S ribosomal RNA gene, partial sequence	1,804 bp	Harpacticoida	Canthocamptidae	Attheyella	Attheyella crassa
54401784	AY627015.1	Bryocamptus pygmaeus 18S small subunit ribosomal RNA gene, partial sequence	1,809 bp	Harpacticoida	Canthocamptidae	Bryocamptus	Bryocamptus pygmaeus
170601584	EU380309.1	Itunella muelleri 18S ribosomal RNA gene, partial sequence	1,814 bp	Harpacticoida	Canthocamptidae	Itunella	Itunella muelleri
170601580	EU380308.1	Mesochra rapiens 18S ribosomal RNA gene, partial sequence	1,817 bp	Harpacticoida	Canthocamptidae	Mesochra	Mesochra rapiens
170601526	EU380295.1	Dactylopusia sp. New Caledonia-RJH-2007 18S ribosomal RNA gene, partial sequence	1,807 bp	Harpacticoida	Dactylopusiidae	Dactylopusia	Dactylopusia sp. New Caledonia-RJH-2007
170601532	EU380296.1	Diarthrodes sp. 1 New Caledonia-RJH-2007 18S ribosomal RNA gene, partial sequence	1,807 bp	Harpacticoida	Dactylopusiidae	Diarthrodes	Diarthrodes sp. 1 New Caledonia-RJH-2007
170601543	EU380299.1	Sewellia tropica 18S ribosomal RNA gene, partial sequence	1,774 bp	Harpacticoida	Dactylopusiidae	Sewellia	Sewellia tropica
54401785	AY627016.1	Bradya sp. Greenland-RJH-2004 18S small subunit ribosomal RNA gene, partial sequence	1,789 bp	Harpacticoida	Ectinosomatidae	Bradya	Bradya sp. Greenland-RJH-2004
170601487	EU380285.1	Harpacticus sp. France_RJH_2007 18S ribosomal RNA gene, partial sequence	1,786 bp	Harpacticoida	Harpacticidae	Harpacticus	Harpacticus sp. France_RJH_2007
172072975	EU370430.1	Tigriopus fulvus strain C21 18S ribosomal RNA gene, partial sequence	1,792 bp	Harpacticoida	Harpacticidae	Tigriopus	Tigriopus fulvus
506484928	AY599492.2	Tigriopus californicus strain SD 28S ribosomal RNA gene, partial sequence; 28S-18S ribosomal RNA intergenic spacer, 18S ribosomal RNA gene, internal transcribed spacer 1, 5.8S ribosomal RNA gene, and internal transcribed spacer 2, complete sequence; and 28S ribosomal RNA gene, partial sequence	6,590 bp	Harpacticoida	Harpacticidae	Tigriopus	Tigriopus californicus
158021652	EU054307.1	Tigriopus japonicus intergenic spacer, partial sequence; 18S ribosomal RNA gene, internal transcribed spacer 1, 5.8S ribosomal RNA gene, and internal transcribed spacer 2, complete sequence; and 28S ribosomal RNA gene, partial sequence	7,709 bp	Harpacticoida	Harpacticidae	Tigriopus	Tigriopus japonicus
170601482	EU380284.1	Zaus caeruleus 18S ribosomal RNA gene, partial sequence	1,808 bp	Harpacticoida	Harpacticidae	Zaus	Zaus caeruleus
170601508	EU380290.1	Diosaccus sp. New Caledonia-RJH-2007 18S ribosomal RNA gene, partial sequence	1,813 bp	Harpacticoida	Miraciidae	Diosaccus	Diosaccus sp. New Caledonia-RJH-2007
170601522	EU380294.1	Miracia efferata 18S ribosomal RNA gene, partial sequence	1,778 bp	Harpacticoida	Miraciidae	Miracia	Miracia efferata
170601519	EU380293.1	Paramphiascella fulvofasciata 18S ribosomal RNA gene, partial sequence	1,808 bp	Harpacticoida	Miraciidae	Paramphiascella	Paramphiascella fulvofasciata
170601512	EU380291.1	Stenhelia sp. Greenland-RJH-2007 18S ribosomal RNA gene, partial sequence	1,794 bp	Harpacticoida	Miraciidae	Stenhelia	Stenhelia sp. Greenland-RJH-2007
170601515	EU380292.1	Typhlamphiascus typhlops 18S ribosomal RNA gene, partial sequence	1,794 bp	Harpacticoida	Miraciidae	Typhlamphiascus	Typhlamphiascus typhlops
170601556	EU380302.1	Parastenhelia sp. New Caledonia-RJH-2007 18S ribosomal RNA gene, partial sequence	1,843 bp	Harpacticoida	Parastenheliidae	Parastenhelia	Parastenhelia sp. New Caledonia-RJH-2007
170601500	EU380288.1	Peltidium sp. New Caledonia-RJH-2007 18S ribosomal RNA gene, partial sequence	1,809 bp	Harpacticoida	Peltidiidae	Peltidium	Peltidium sp. New Caledonia-RJH-2007
170601495	EU380287.1	Tegastes sp. 2 New Caledonia-RJH-2007 18S ribosomal RNA gene, partial sequence	1,824 bp	Harpacticoida	Tegastidae	Tegastes	Tegastes sp. 2 New Caledonia-RJH-2007
170601552	EU380301.1	Eudactylopus sp. New Caledonia-RJH-2007 18S ribosomal RNA gene, partial sequence	1,817 bp	Harpacticoida	Thalestridae	Eudactylopus	Eudactylopus sp. New Caledonia-RJH-2007
170601547	EU380300.1	Paramenophia sp. New Caledonia-RJH-2007 18S ribosomal RNA gene, partial sequence	1,819 bp	Harpacticoida	Thalestridae	Paramenophia	Paramenophia sp. New Caledonia-RJH-2007
170601540	EU380298.1	Phyllothalestris sp. New Caledonia-RJH-2007 18S ribosomal RNA gene, partial sequence	1,808 bp	Harpacticoida	Thalestridae	Phyllothalestris	Phyllothalestris sp. New Caledonia-RJH-2007
261824306	FJ713566.1	Tisbe sp. JSL-2009 18S ribosomal RNA gene, partial sequence	1,766 bp	Harpacticoida	Tisbidae	Tisbe	Tisbe sp. JSL-2009
108796353	DQ538498.1	Cymbasoma sp. New Caledonia RJH-2006 18S ribosomal RNA gene, partial sequence	1,785 bp	Monstrilloida	Monstrillidae	Cymbasoma	Cymbasoma sp. New Caledonia RJH-2006
108796350	DQ538495.1	Monstrilla clavata 18S ribosomal RNA gene, partial sequence	1,788 bp	Monstrilloida	Monstrillidae	Monstrilla	Monstrilla clavata
108796352	DQ538497.1	Monstrillopsis sp. New Caledonia RJH-2006 18S ribosomal RNA gene, partial sequence	1,771 bp	Monstrilloida	Monstrillidae	Monstrillopsis	Monstrillopsis sp. New Caledonia RJH-2006
54401772	AY627003.1	Lernentoma asellina 18S small subunit ribosomal RNA gene, partial sequence	1,806 bp	Poecilostomatoida	Chondracanthidae	Lernentoma	Lernentoma asellina
356471534	JF781545.1	Mecomerinx heterocentroti 18S ribosomal RNA gene, partial sequence	1,807 bp	Poecilostomatoida	Pseudanthessiidae	Mecomerinx	Mecomerinx heterocentroti
295443380	GU969173.1	Sapphirina darwinii 18S ribosomal RNA gene, partial sequence	1,738 bp	Poecilostomatoida	Sapphirinidae	Sapphirina	Sapphirina darwinii
295443415	GU969208.1	Sapphirina scarlata 18S ribosomal RNA gene, partial sequence	1,737 bp	Poecilostomatoida	Sapphirinidae	Sapphirina	Sapphirina scarlata
356471544	JF781555.1	Catinia plana 18S ribosomal RNA gene, partial sequence	1,808 bp	Poecilostomatoida	Catiniidae	Catinia	Catinia plana
356471542	JF781553.1	Clausidium vancouverense 18S ribosomal RNA gene, partial sequence	1,806 bp	Poecilostomatoida	Clausidiidae	Clausidium	Clausidium vancouverense
356471541	JF781552.1	Hemicyclops thalassius 18S ribosomal RNA gene, partial sequence	1,807 bp	Poecilostomatoida	Clausidiidae	Hemicyclops	Hemicyclops thalassius
356471538	JF781549.1	Clavisodalis abbreviatus 18S ribosomal RNA gene, partial sequence	1,819 bp	Poecilostomatoida	Taeniacanthidae	Clavisodalis	Clavisodalis abbreviatus
356471536	JF781547.1	Taeniacanthus zeugopteri 18S ribosomal RNA gene, partial sequence	1,815 bp	Poecilostomatoida	Taeniacanthidae	Taeniacanthus	Taeniacanthus zeugopteri
356471537	JF781548.1	Taeniacanthus kitamakura 18S ribosomal RNA gene, partial sequence	1,810 bp	Poecilostomatoida	Taeniacanthidae	Taeniacanthus	Taeniacanthus kitamakura
356471539	JF781550.1	Irodes sauridi 18S ribosomal RNA gene, partial sequence	1,820 bp	Poecilostomatoida	Taeniacanthidae	Irodes	Irodes sauridi
356471535	JF781546.1	Umazuracola elongatus 18S ribosomal RNA gene, partial sequence	1,821 bp	Poecilostomatoida	Umazurcolidae	Umazuracola	Umazuracola elongatus
54401773	AY627004.1	Stellicola sp. New Caledonia-RJH-2004 18S small subunit ribosomal RNA gene, partial sequence	1,760 bp	Poecilostomatoida	Umazurcolidae	Stellicola	Stellicola sp. New Caledonia-RJH-2004
108796359	DQ538504.1	Lichomolgidium sp. New Caledonia RJH-2006 18S ribosomal RNA gene, partial sequence	1,761 bp	Poecilostomatoida	Lichomolgidae	Lichomolgidium	Lichomolgidium sp. New Caledonia
356471532	JF781543.1	Lichomolgus canui 18S ribosomal RNA gene, partial sequence	1,803 bp	Poecilostomatoida	Lichomolgidae	Lichomolgus	Lichomolgus canui
356471533	JF781544.1	Lichomolgus marginatus 18S ribosomal RNA gene, partial sequence	1,803 bp	Poecilostomatoida	Lichomolgidae	Lichomolgus	Lichomolgus marginatus
356471531	JF781542.1	Astericola clausii 18S ribosomal RNA gene, partial sequence	1,805 bp	Poecilostomatoida	Lichomolgidae	Astericola	Astericola clausii
356471540	JF781551.1	Holobomolochus sp. New Caledonia-JLJ-2006 18S ribosomal RNA gene, partial sequence	1,822 bp	Poecilostomatoida	Bomolochidae	Holobomolochus	Holobomolochus sp. New Caledonia-JLJ-2006
54401786	AY627017.1	Orecturus sp. New Caledonia-RJH-2004 18S small subunit ribosomal RNA gene, partial sequence	1,807 bp	Siphonostomatoida	Asterocheridae	Orecturus	Orecturus sp. New Caledonia-RJH-2004
54401789	AY627020.1	Caligus elongatus 18S small subunit ribosomal RNA gene, partial sequence	1,809 bp	Siphonostomatoida	Caligidae	Caligus	Caligus elongatus
564969764	KC569364.1	Caligus fugu 18S ribosomal RNA gene, partial sequence	1,772 bp	Siphonostomatoida	Caligidae	Caligus	Caligus fugu
564969763	KC569363.1	Caligus uniartus 18S ribosomal RNA gene, partial sequence	1,776 bp	Siphonostomatoida	Caligidae	Caligus	Caligus uniartus
74475184	DQ123833.1	Caligus clemensi 18S ribosomal RNA gene, partial sequence	1,770 bp	Siphonostomatoida	Caligidae	Caligus	Caligus clemensi
54401788	AY627019.1	Gloiopotes watsoni 18S small subunit ribosomal RNA gene, partial sequence	1,817 bp	Siphonostomatoida	Caligidae	Gloiopotes	Gloiopotes watsoni
108796358	DQ538503.1	Lepeophtheirus hippoglossi 18S ribosomal RNA gene, partial sequence	1,778 bp	Siphonostomatoida	Caligidae	Lepeophtheirus	Lepeophtheirus hippoglossi
74475182	DQ123831.1	Lepeophtheirus hospitalis 18S ribosomal RNA gene, partial sequence	1,799 bp	Siphonostomatoida	Caligidae	Lepeophtheirus	Lepeophtheirus hospitalis
217031191	FJ447440.1	Lepeophtheirus natalensis isolate ORI 18S ribosomal RNA gene, partial sequence	1,765 bp	Siphonostomatoida	Caligidae	Lepeophtheirus	Lepeophtheirus natalensis
74475181	DQ123830.1	Lepeophtheirus parvicruris 18S ribosomal RNA gene, partial sequence	1,799 bp	Siphonostomatoida	Caligidae	Lepeophtheirus	Lepeophtheirus parvicruris
74475179	DQ123828.1	Lepeophtheirus salmonis 18S ribosomal RNA gene, partial sequence	1,765 bp	Siphonostomatoida	Caligidae	Lepeophtheirus	Lepeophtheirus salmonis
217031192	FJ447441.1	Paralebion elongatus isolate 12N7pe 18S ribosomal RNA gene, partial sequence	1,766 bp	Siphonostomatoida	Caligidae	Paralebion	Paralebion elongatus
54401791	AY627022.1	Stenopontius sp. New Caledonia-RJH-2004 18S small subunit ribosomal RNA gene, partial sequence	1,755 bp	Siphonostomatoida	Dinopontiidae	Stenopontius	Stenopontius sp. New Caledonia-RJH-2004
108796363	DQ538508.1	Aphotopontius mammillatus 18S ribosomal RNA gene, partial sequence	1,808 bp	Siphonostomatoida	Dirivultidae	Aphotopontius	Aphotopontius mammillatus
108796361	DQ538506.1	Ceuthoecetes sp. RJH-2006 18S ribosomal RNA gene, partial sequence	1,807 bp	Siphonostomatoida	Dirivultidae	Ceuthoecetes	Ceuthoecetes sp. RJH-2006
108796355	DQ538500.1	Dissonus manteri 18S ribosomal RNA gene, partial sequence	1,805 bp	Siphonostomatoida	Dissonidae	Dissonus	Dissonus manteri
54401793	AY627024.1	Ecbathyrion prolixicauda 18S small subunit ribosomal RNA gene, partial sequence	1,808 bp	Siphonostomatoida	Ecbathyriontidae	Ecbathyrion	Ecbathyrion prolixicauda
217031190	FJ447439.1	Eudactylina pusilla isolate 10N3ep 18S ribosomal RNA gene, partial sequence	1,762 bp	Siphonostomatoida	Eudactylinidae	Eudactylina	Eudactylina pusilla
217031189	FJ447438.1	Eudactylinodes niger isolate 9R13en 18S ribosomal RNA gene, partial sequence	1,762 bp	Siphonostomatoida	Eudactylinidae	Eudactylinodes	Eudactylinodes niger
217031179	FJ447428.1	Nemesis lamna isolate 12N4n 18S ribosomal RNA gene, partial sequence	1,762 bp	Siphonostomatoida	Eudactylinidae	Nemesis	Nemesis lamna
217031193	FJ447442.1	Alebion sp. SMD-2008 isolate 9R3a 18S ribosomal RNA gene, partial sequence	1,774 bp	Siphonostomatoida	Euryphoridae	Alebion	Alebion sp. SMD-2008
108796362	DQ538507.1	Hatschekia sp. RJH-2006 18S ribosomal RNA gene, partial sequence	1,813 bp	Siphonostomatoida	Hatschekiidae	Hatschekia	Hatschekia sp. RJH-2006
54401795	AY627026.1	Hatschekia pagrosomi 18S small subunit ribosomal RNA gene, partial sequence	1,776 bp	Siphonostomatoida	Hatschekiidae	Hatschekia	Hatschekia pagrosomi
217031175	FJ447424.1	Kroyeria dispar isolate 10N3kd 18S ribosomal RNA gene, partial sequence	1,764 bp	Siphonostomatoida	Kroyeriidae	Kroyeria	Kroyeria dispar
217031178	FJ447427.1	Kroyeria longicauda isolate 10N12kl 18S ribosomal RNA gene, partial sequence	1,767 bp	Siphonostomatoida	Kroyeriidae	Kroyeria	Kroyeria longicauda
217031176	FJ447425.1	Kroyeria papillipes isolate 10N3kp 18S ribosomal RNA gene, partial sequence	1,764 bp	Siphonostomatoida	Kroyeriidae	Kroyeria	Kroyeria papillipes
217031177	FJ447426.1	Kroyeria sphyrnae isolate 9R4ks 18S ribosomal RNA gene, partial sequence	1,765 bp	Siphonostomatoida	Kroyeriidae	Kroyeria	Kroyeria sphyrnae
54401797	AY627028.1	Clavella addunca 18S small subunit ribosomal RNA gene, partial sequence	1,800 bp	Siphonostomatoida	Lernaeopodidae	Clavella	Clavella addunca
54401796	AY627027.1	Parabrachiella bispinosa 18S small subunit ribosomal RNA gene, partial sequence	1,818 bp	Siphonostomatoida	Lernaeopodidae	Parabrachiella	Parabrachiella bispinosa
54401798	AY627029.1	Nanaspis tonsa 18S small subunit ribosomal RNA gene, partial sequence	1,767 bp	Siphonostomatoida	Nanaspididae	Nanaspis	Nanaspis tonsa
108796364	DQ538509.1	Choniosphaera maenadis 18S ribosomal RNA gene, partial sequence	1,776 bp	Siphonostomatoida	Nicothoidae	Choniosphaera	Choniosphaera maenadis
217031203	FJ447452.1	Achtheinus oblongus isolate 12N3ao 18S ribosomal RNA gene, partial sequence	1,772 bp	Siphonostomatoida	Pandaridae	Achtheinus	Achtheinus oblongus
108796356	DQ538501.1	Dinemoura latifolia 18S ribosomal RNA gene, partial sequence	1,789 bp	Siphonostomatoida	Pandaridae	Dinemoura	Dinemoura latifolia
217031195	FJ447444.1	Nesippus crypturus isolate 12N5n 18S ribosomal RNA gene, partial sequence	1,773 bp	Siphonostomatoida	Pandaridae	Nesippus	Nesippus crypturus
217031196	FJ447445.1	Nesippus orientalis isolate 5N9no 18S ribosomal RNA gene, partial sequence	1,774 bp	Siphonostomatoida	Pandaridae	Nesippus	Nesippus orientalis
217031194	FJ447443.1	Nesippus vespa isolate 8N9nv 18S ribosomal RNA gene, partial sequence	1,773 bp	Siphonostomatoida	Pandaridae	Nesippus	Nesippus vespa
108796357	DQ538502.1	Pandarus smithi 18S ribosomal RNA gene, partial sequence	1,782 bp	Siphonostomatoida	Pandaridae	Pandarus	Pandarus smithi
217031201	FJ447450.1	Pannosus japonicus isolate 12N2pj 18S ribosomal RNA gene, partial sequence	1,767 bp	Siphonostomatoida	Pandaridae	Pannosus	Pannosus japonicus
217031204	FJ447453.1	Perissopus dentatus isolate 9R3pd 18S ribosomal RNA gene, partial sequence	1,772 bp	Siphonostomatoida	Pandaridae	Perissopus	Perissopus dentatus
217031200	FJ447449.1	Phyllothyreus cornutus isolate 8N2pc 18S ribosomal RNA gene, partial sequence	1,765 bp	Siphonostomatoida	Pandaridae	Phyllothyreus	Phyllothyreus cornutus
217031202	FJ447451.1	Pseudopandarus longus isolate 9R3pl 18S ribosomal RNA gene, partial sequence	1,753 bp	Siphonostomatoida	Pandaridae	Pseudopandarus	Pseudopandarus longus
54401800	AY627031.1	Pontoeciella abyssicola 18S small subunit ribosomal RNA gene, partial sequence	1,780 bp	Siphonostomatoida	Pontoeciellidae	Pontoeciella	Pontoeciella abyssicola
356471521	JF781532.1	Misophriopsis okinawensis 18S ribosomal RNA gene, partial sequence	1,786 bp	Misophrioida	Misophriidae	Misophriopsis	Misophriopsis okinawensis
